# Supplementary material for: The role of particulate matter in reduced visibility and anionic composition of winter fog: a case study for Amritsar city
Source: Royal Society of Chemistry journal article supplement (doi:10.1039/d2ra00424k), 2022-01-01
Supplement: d2ra00424k1.pdf [file d2ra00424k1.pdf]

## Supplementary Information

### The role of particulate matter in reduced visibility and anionic composition of winter fog: A case study for Amritsar city

Rekha Yadav<sup>1</sup>, Aditi Sugha<sup>1</sup>, Manpreet S Bhatti<sup>1\*</sup>, Sushil K Kansal<sup>2</sup>, Sudhir K Sharma<sup>3</sup>,  
Tuhin K Mandal<sup>3\*</sup>

<sup>1</sup>*Department of Botanical and Environmental Sciences, Guru Nanak Dev University, Amritsar, Punjab, India*

<sup>2</sup>*Dr. SSB University Institute of Chemical Engineering and Technology, Panjab University, Chandigarh, India*

<sup>3</sup>*Environmental Sciences and Biomedical Metrology Division, CSIR- National Physical Laboratory, Dr. K S Krishnan Road, New Delhi, India*

[rekha1994.gndu@gmail.com](mailto:rekha1994.gndu@gmail.com)

[asugha12@gmail.com](mailto:asugha12@gmail.com)

[sushilkk1@yahoo.co.in](mailto:sushilkk1@yahoo.co.in)

[sudhiresir@gmail.com](mailto:sudhiresir@gmail.com)

(Rekha Yadav)

(Aditi Sugha)

(Sushil K Kansal)

(Sudhir K Sharma)

#### Corresponding author (*contributed equally*):

Dr. Manpreet S Bhatti  
Professor,  
Department of Botanical & Environmental  
Science,  
Guru Nanak Dev University,  
Amritsar-143005, Punjab, INDIA  
Email: [mbhatti.dobes@gndu.ac.in](mailto:mbhatti.dobes@gndu.ac.in)  
[mbhatti73@gmail.com](mailto:mbhatti73@gmail.com)  
Phone: +91-9417107598 (cell)

Dr. Tuhin K Mandal  
Principal Scientist  
Environmental Sciences & Biomedical  
Metrology Division  
CSIR-National Physical Laboratory  
Dr. K.S. Krishnan Road, New Delhi-110012  
E-mail: [tuhin.npl@nic.in](mailto:tuhin.npl@nic.in)  
[tuhinkumarmandal@gmail.com](mailto:tuhinkumarmandal@gmail.com)  
Phone: +91-9818479956 (cell)

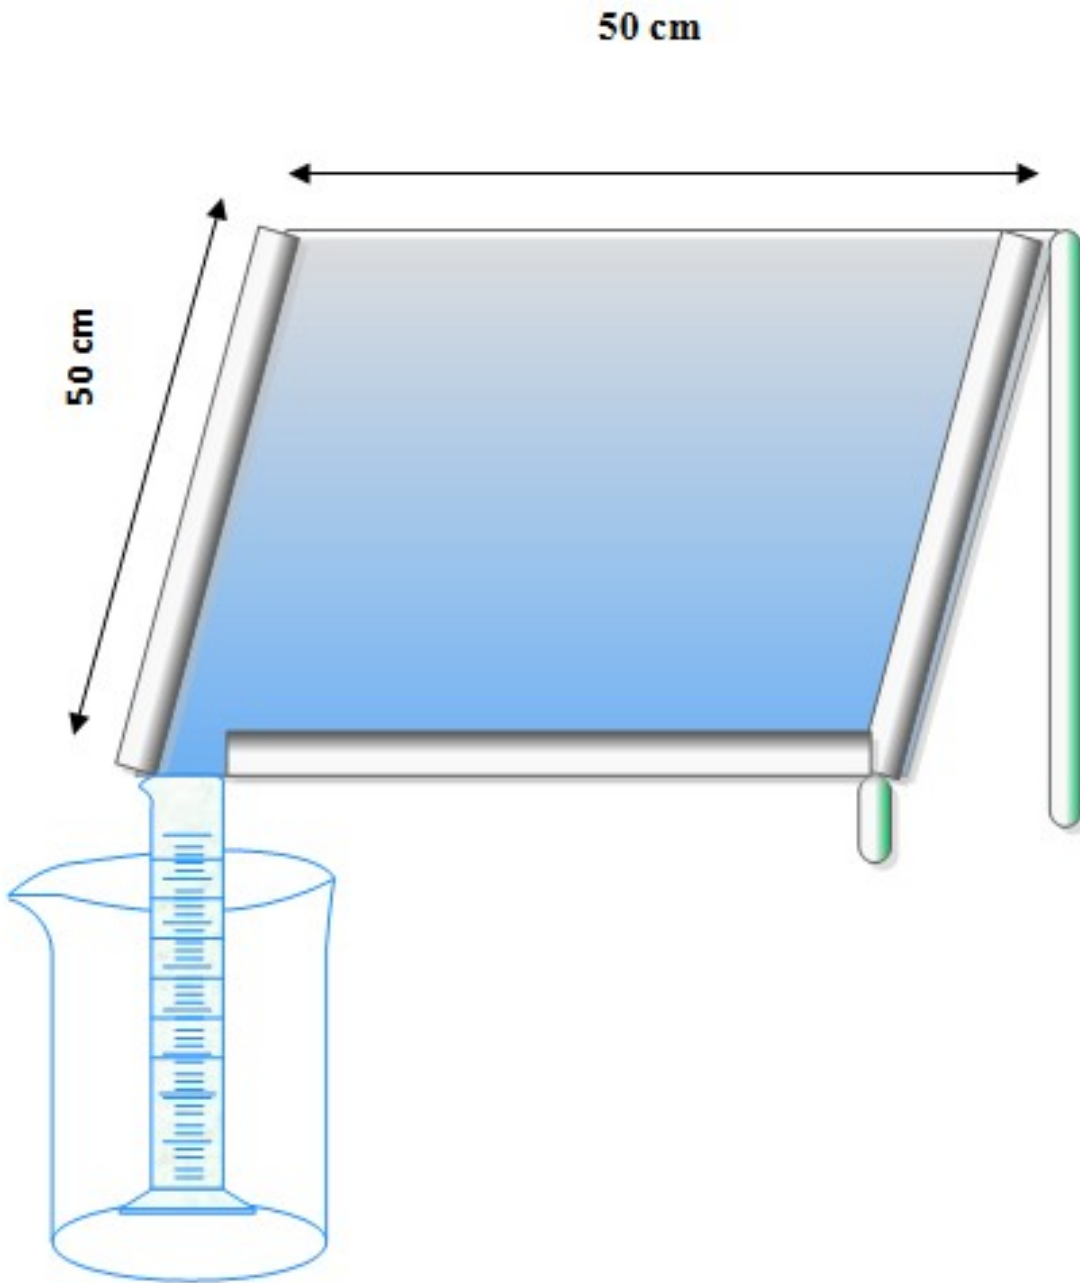

**Figure S1.** Line diagram of fog collector

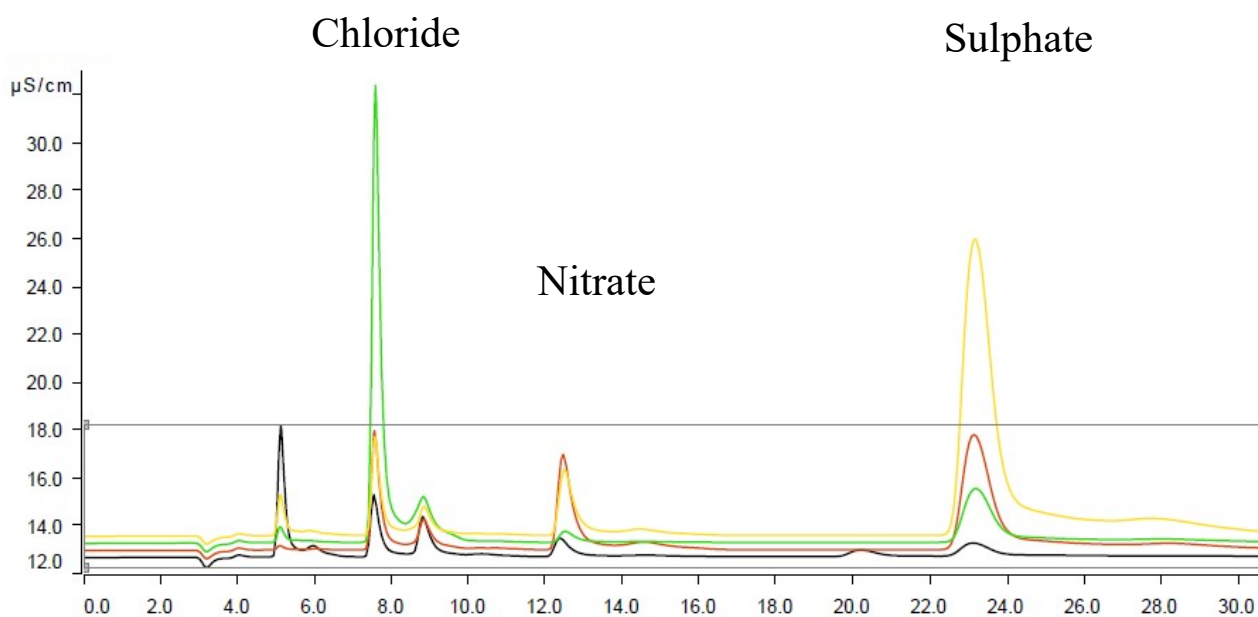

| Line colour | Date of Sampling     | Chloride (ppm) | Nitrate (ppm) | Sulphate (ppm) |
|-------------|----------------------|----------------|---------------|----------------|
| —           | 6 Nov. 2017          | 20.2           | 51.8          | 83.1           |
| —           | 29 Dec. 2018         | 71.8           | 6.6           | 39.5           |
| —           | 5 Jan. 2018          | 16.7           | 36.6          | 271.0          |
| —           | Mixed 5 ppm standard | 5.01           | 5.03          | 4.99           |

**Figure S2.** Chromatogram showing overlay plot of different fog water samples (*details see Table S1*). X-axis= Retention time (min) and Y-axis=Conductivity ( $\mu\text{S}/\text{cm}$ )

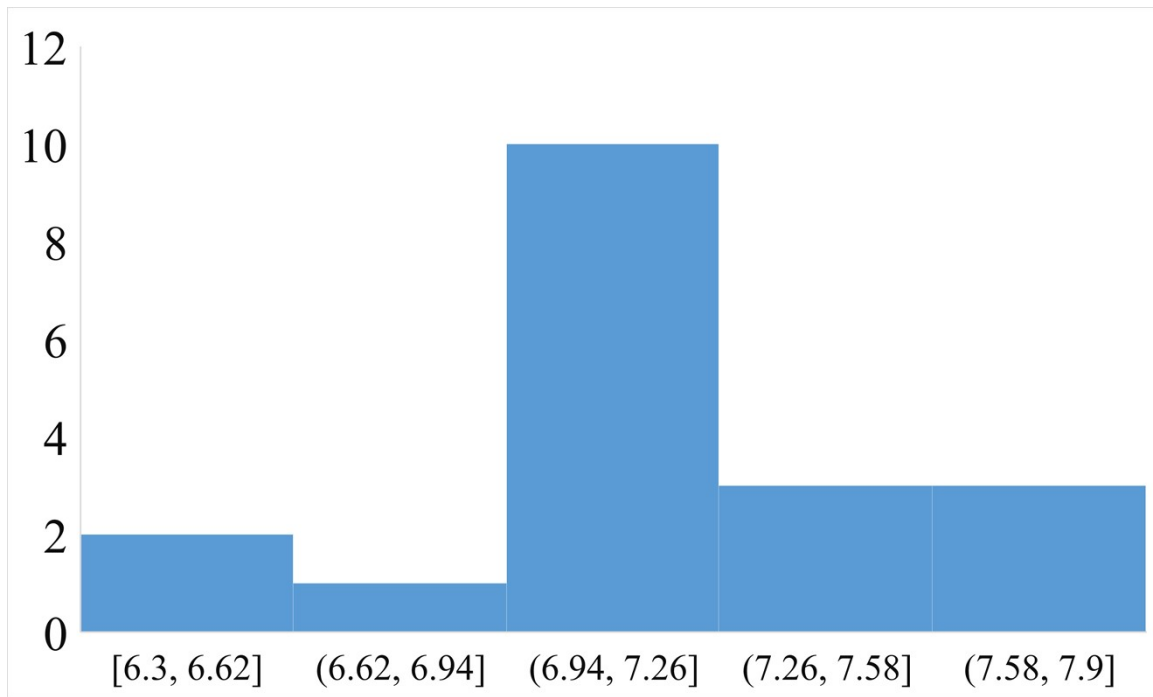

[A]

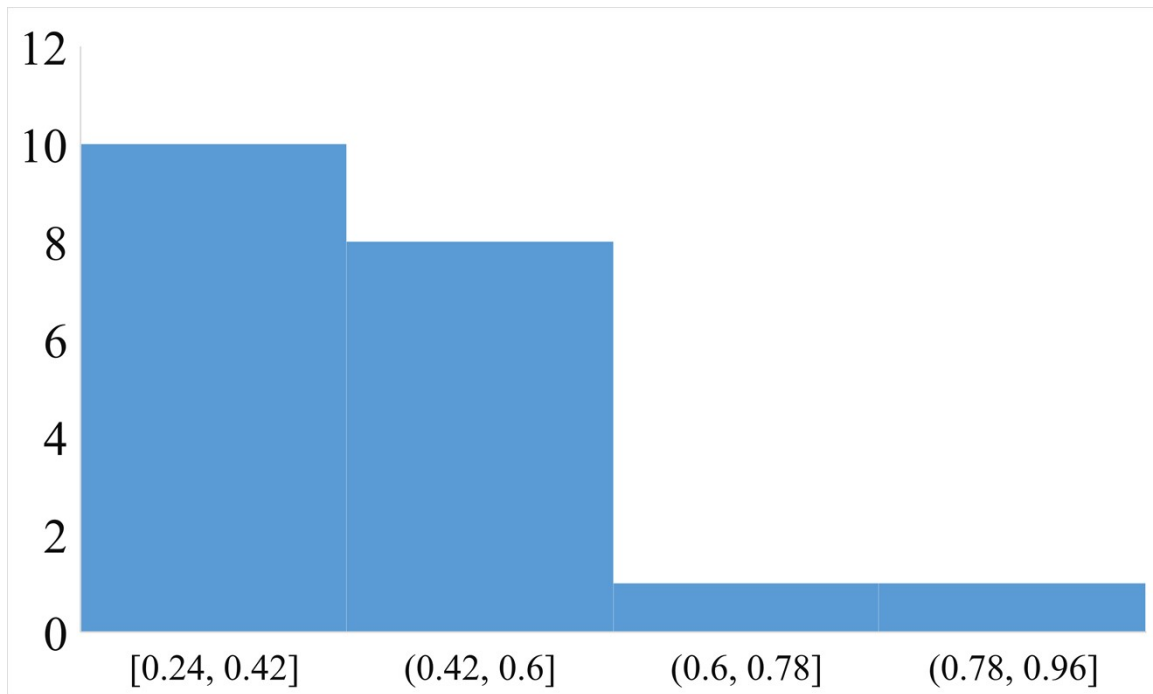

[B]

**Figure S3.** Histogram of A) pH B) conductivity measurements in fog water of Amritsar

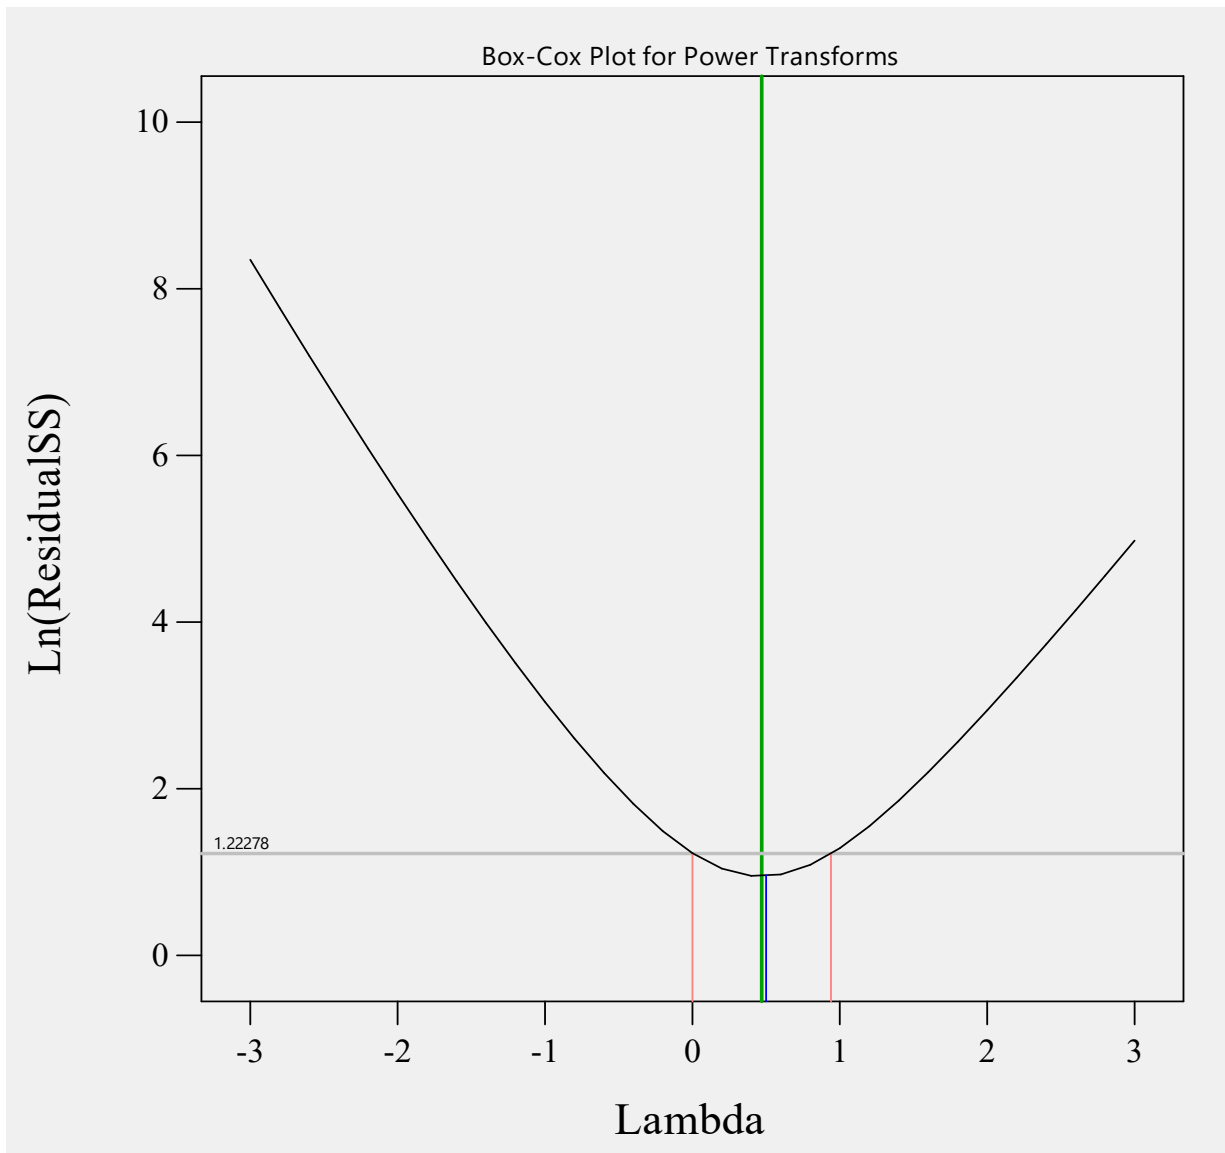

**Figure S4.** Box-Cox plot for power transforms indicated square root transformation of the response data (visibility) in multiple linear regression modelling

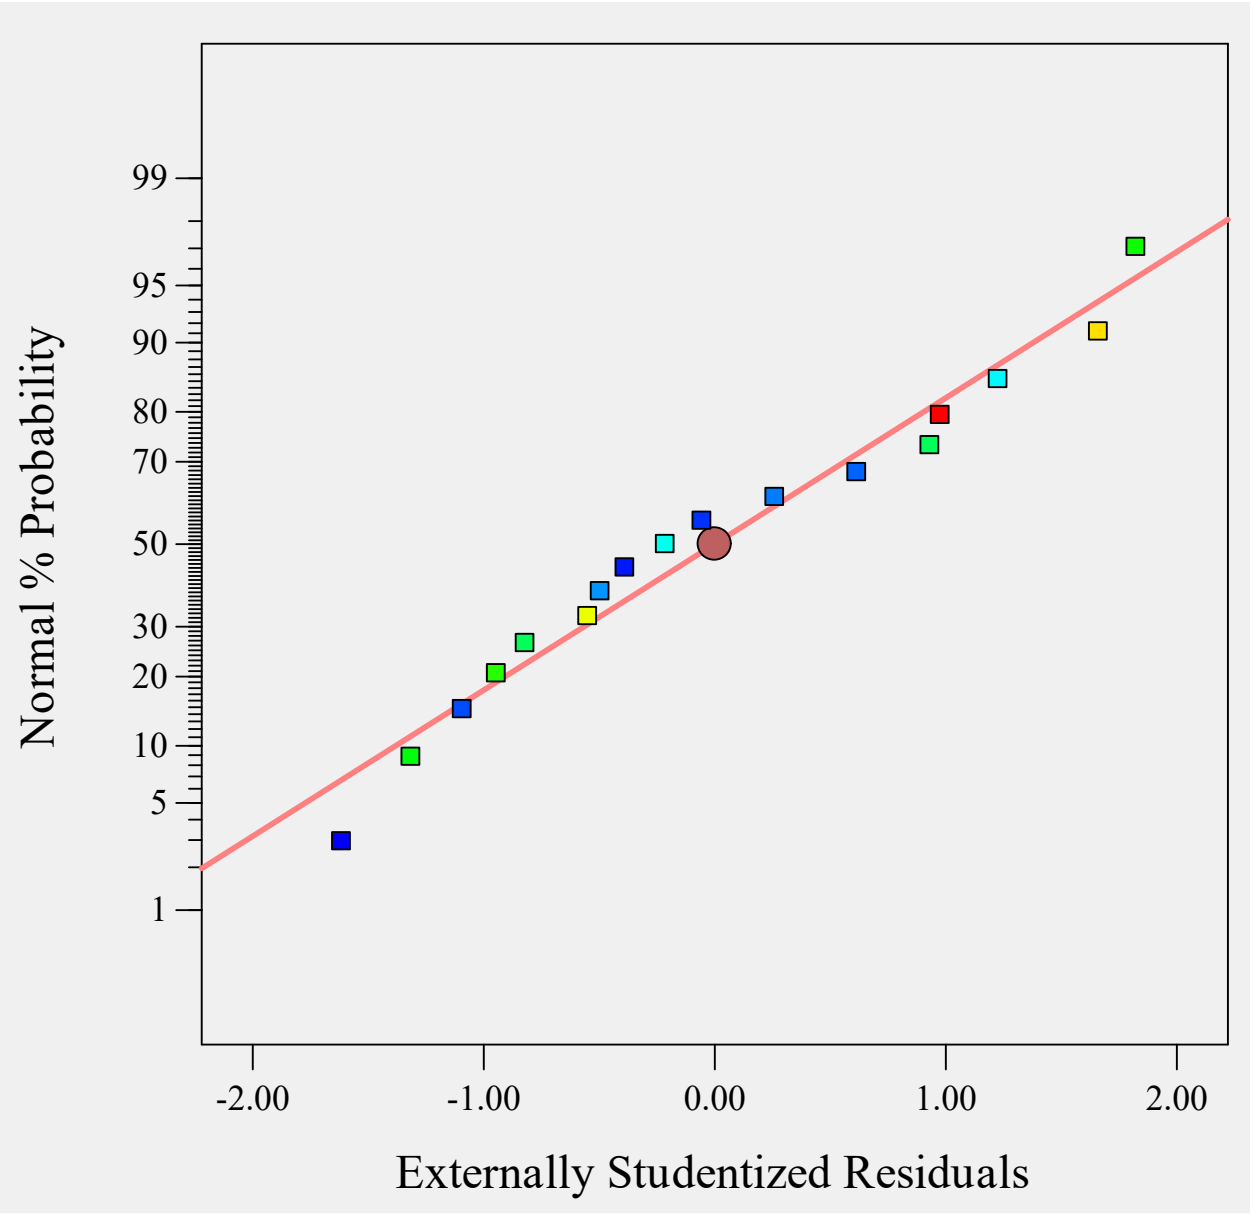

**Figure S5.** Normal plot of residuals showing the perfect fitting of response variable after square root transformation of the response variable (visibility)

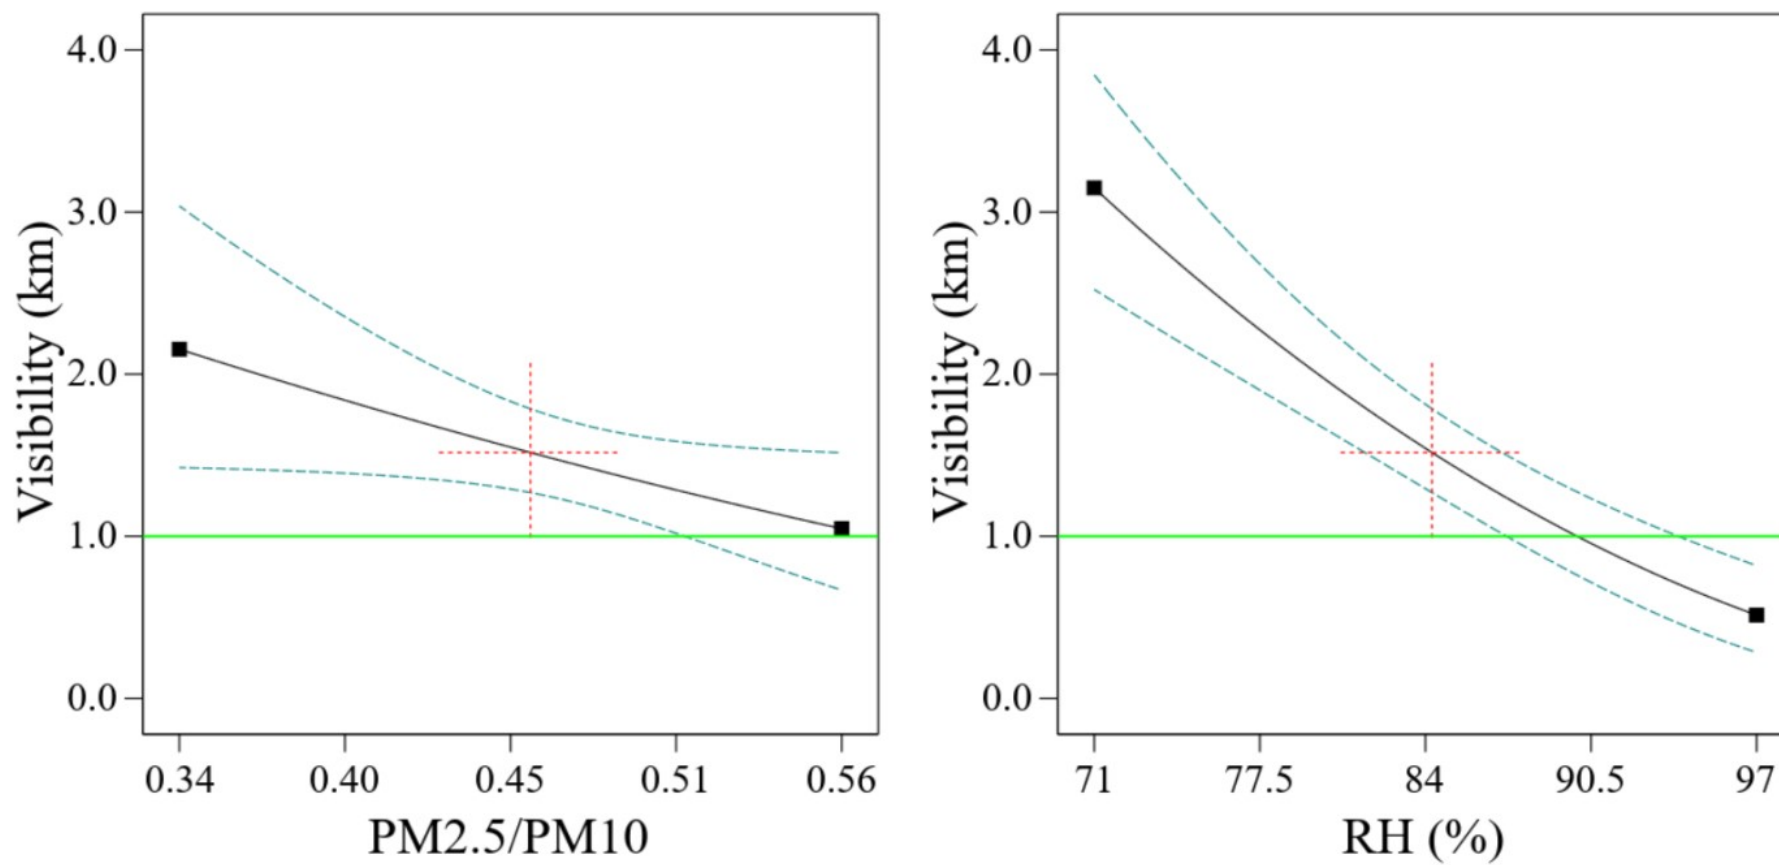

**Figure S6.** One-factor plot showing the effect of A) PM<sub>2.5</sub>/PM<sub>10</sub> ratio on visibility B) relative humidity on visibility

**Table S1.** Global perspective of fog characterization along with dominant sources of ions

| S. N.          | Country     | Location           | Location type   | MSL (m) | Coordinates       | N  | Study Period         | pH (avg) | Cond. (avg) | NO <sub>3</sub> <sup>-</sup> (avg) | SO <sub>4</sub> <sup>2-</sup> (avg) | NO <sub>3</sub> <sup>-</sup> to SO <sub>4</sub> <sup>2-</sup> molar ratio | Sequence of ions                                                                                                               | Major sources                                                   | Reference                 |                   |
|----------------|-------------|--------------------|-----------------|---------|-------------------|----|----------------------|----------|-------------|------------------------------------|-------------------------------------|---------------------------------------------------------------------------|--------------------------------------------------------------------------------------------------------------------------------|-----------------------------------------------------------------|---------------------------|-------------------|
| 1              | Ecuador     | El-Tiro            | Mountain        | 2825    | 3.59 S, 79.09 W   | 56 | Nov 2003-Feb 2004    | 4.5      | 31          | 40                                 | 44                                  | 0.91                                                                      | NH <sub>4</sub> <sup>+</sup> > SO <sub>4</sub> <sup>2-</sup> > NO <sub>3</sub> <sup>-</sup> > Cl <sup>-</sup>                  | Biomass burning, industry, traffic                              | Beiderweiden et al., 2005 |                   |
| 2              | France      | Pessac             | Urban           | 17      | 44.47 N, 0.39 W   | 4  | Jan 2002-Jan 2003    | 6.2      | 58          | 69                                 | 83                                  | 0.83                                                                      | Cl <sup>-</sup> > NO <sub>3</sub> <sup>-</sup> >SO <sub>4</sub> <sup>2-</sup>                                                  | Industry, transportation, agriculture, soil and dust            | Beysen et al., 2006       |                   |
| 3              | Poland      | Zakopane           | Semi-Urban      | 911     | 49.17 N, 19.58E   | 4  | Jan 2005-Dec 2006    | 5.1      | 272         | 260                                | 460                                 | 0.57                                                                      | NH <sub>4</sub> <sup>+</sup> > Cl <sup>-</sup> > SO <sub>4</sub> <sup>2-</sup> > NO <sub>3</sub> <sup>-</sup>                  | Urban agglomeration, agriculture, transportation, local heating | Blas et al., 2010         |                   |
| 4              | South Korea | Baengnyeong Island | Semi-Urban      | 100     | 37.58 N, 124.37 E | 13 | June-July 2014       | 3.9      | ND          | 1260                               | 1460                                | 0.86                                                                      | NH <sub>4</sub> <sup>+</sup> > NO <sub>3</sub> <sup>-</sup> > SO <sub>4</sub> <sup>2-</sup> >Na <sup>+</sup>                   | Marine, biomass burning, long range transport                   | Boris et al., 2016        |                   |
| 5              | USA         | Casitas pass       | Coastal         | 350     | 34.38, -119.38    | 20 | June 8-14 2015       | 5.9      | ND          | 126                                | 56                                  | 2.25                                                                      | NH <sub>4</sub> <sup>+</sup> > NO <sub>3</sub> <sup>-</sup> >Na <sup>+</sup> > Cl <sup>-</sup> > SO <sub>4</sub> <sup>2-</sup> | Urban and industrial combustion, Marine influence               | Boris et al., 2018        |                   |
| 6              | India       | New Delhi          | Urban           | 218     | 28.56 N, 77.09 E  | 8  | Jan-Feb 2016         | 6.9      | 1236        | 900                                | 3700                                | 0.24                                                                      | NH <sub>4</sub> <sup>+</sup> > SO <sub>4</sub> <sup>2-</sup> > Cl <sup>-</sup> > NO <sub>3</sub> <sup>-</sup>                  | Air craft emissions, local sources, Marine and crustal          | Ghude et al., 2017        |                   |
| 7              | India       | Kanpur             | Urban           | 142     | 26.5 N, 80.3 E,   |    | Jan-Feb 2010         | 7.2      | ND          | ND                                 | ND                                  | ND                                                                        | ND                                                                                                                             | ND                                                              | ND                        | Kaul et al., 2011 |
| 8              | South Korea | Daekwa nreung      | Mountain forest | 840     | 37.41 N, 128.27 E | 17 | March 2002-Sept 2003 | 4.4      | 149         | 493                                | 489                                 | 1.01                                                                      | NH <sub>4</sub> <sup>+</sup> > NO <sub>3</sub> <sup>-</sup> > SO <sub>4</sub> <sup>2-</sup> > Cl <sup>-</sup>                  | Local sources, long range transport                             | Kim et al., 2006          |                   |
| 9 <sup>a</sup> | India       | New Delhi          | Urban           | 218     | 28.35 N, 77.12 E  | 50 | 2010-2011            | 6.6      | ND          | 51                                 | 232                                 | 0.22                                                                      | SO <sub>4</sub> <sup>2-</sup> > Cl <sup>-</sup> > NO <sub>2</sub> <sup>-</sup> > NO <sub>3</sub> <sup>-</sup> > F <sup>-</sup> | Coal burning and Vehicular emissions                            | Kumar and Yadav, 2013     |                   |

*Continue...*



| S. N.           | Country | Location           | Location type | MSL (m) | Coordinates       | N   | Study Period          | pH (avg) | Cond. (avg) | NO <sub>3</sub> <sup>-</sup> (avg) | SO <sub>4</sub> <sup>-2</sup> (avg) | NO <sub>3</sub> <sup>-</sup> to SO <sub>4</sub> <sup>-2</sup> molar ratio | Sequence of ions                                                                                              | Major sources                                                                                         | Reference               |
|-----------------|---------|--------------------|---------------|---------|-------------------|-----|-----------------------|----------|-------------|------------------------------------|-------------------------------------|---------------------------------------------------------------------------|---------------------------------------------------------------------------------------------------------------|-------------------------------------------------------------------------------------------------------|-------------------------|
| 10              | India   | Agra               | Urban         | 169     | 27.10 N, 78.05 E  | 32  | Dec 1998-Jan 2000     | 7.2      | ND          | 494                                | 691                                 | 0.71                                                                      | NH <sub>4</sub> <sup>+</sup> > SO <sub>4</sub> <sup>-2</sup> > NO <sub>3</sub> <sup>-</sup> > Cl <sup>-</sup> | Coal combustions activities, agriculture soil and road side dust                                      | Lakhani et al., 2007    |
| 11 <sup>b</sup> | Morocco | Mirleft            | Semi-Urban    | 43      | 29.35 N, 10.02 W  | 178 | May 2007-April 2008   | 7.4      | 725         | 240                                | 381                                 | 0.63                                                                      | Cl <sup>-</sup> > SO <sub>4</sub> <sup>-2</sup> >NO <sub>3</sub> <sup>-</sup>                                 | sea salts, crustal dust                                                                               | Lekouch et al.,2011     |
| 12              | China   | Shanghai           | Urban         | 4       | 31.18 N, 121.29 E | 26  | March 2009-March 2010 | 5.9      | 2050        | 2416                               | 2830                                | 0.85                                                                      | NH <sub>4</sub> <sup>+</sup> > SO <sub>4</sub> <sup>-2</sup> > NO <sub>3</sub> <sup>-</sup> > Cl <sup>-</sup> | Agriculture, factories, traffic, civil construction, long range transport of sea salt                 | Li et al., 2011         |
| 13              | India   | New Delhi          | Urban         | 218     | 28.35 N, 77.12 E  | 14  | Dec 2014-March 2015   | 5.4      | 3501        | 4545                               | 11725                               | 0.39                                                                      | SO <sub>4</sub> <sup>-2</sup> > Cl <sup>-</sup> > NO <sub>3</sub> <sup>-</sup> > F <sup>-</sup>               | Agriculture fields, coal fired power plants, plastic burning, fossil fuel combustion, biomass burning | Nath and Yadav 2018     |
| 14              | China   | Ailaoshan Mountain | Mountain      | 2476    | 24.54 N, 101.02 E | 117 | Dec 2015-March 2016   | 4.1      | 71          | 69                                 | 185                                 | 0.37                                                                      | NH <sub>4</sub> <sup>+</sup> > SO <sub>4</sub> <sup>-2</sup> > NO <sub>3</sub> <sup>-</sup> > Cl <sup>-</sup> | Long range transport                                                                                  | Nieberding et al., 2018 |
| 15              | India   | Amritsar           | Urban         | 234     | 31.63 N, 74.87 E  | 21  | Nov 2017-Feb 2018     | 7.2      | 455         | 324                                | 2465                                | 0.15                                                                      | SO <sub>4</sub> <sup>-2</sup> > Cl <sup>-</sup> > NO <sub>3</sub> <sup>-</sup>                                | Trash burning                                                                                         | Own study               |
| 16              | Taiwan  | Taipei             | Semi-Urban    | 1150    | 23.39 N, 120.47 E | 69  | Sept 2013-Nov 2013    | 4.1      | 358         | 703                                | 682                                 | 1.03                                                                      | NH <sub>4</sub> <sup>+</sup> > NO <sub>3</sub> <sup>-</sup> > SO <sub>4</sub> <sup>-2</sup> > Cl <sup>-</sup> | Agriculture emissions, fossil fuel combustion, long range transport and Marine                        | Simon et al., 2016      |
| 17              | USA     | Selinsgrove        | Rural         | 135     | 40.79 N, 76.88 W  | 41  | 2007-2010             | 4.7      | ND          | 48                                 | 141                                 | 0.34                                                                      | NH <sub>4</sub> <sup>+</sup> > SO <sub>4</sub> <sup>-2</sup> > NO <sub>3</sub> <sup>-</sup> > Cl <sup>-</sup> | Agriculture emission, soil, long range transport                                                      | Straub et al., 2012     |
| 18              | Norway  | Hakadal            | Semi-Urban    | 170     | 60.11 N, 10.83 E  | 6   | Sept-Nov 2011         | 4.7      | ND          | 61.7                               | 43                                  | 1.43                                                                      | NH <sub>4</sub> <sup>+</sup> > NO <sub>3</sub> <sup>-</sup> > Cl <sup>-</sup> > SO <sub>4</sub> <sup>-2</sup> | Sea salt, anthropogenic                                                                               | Wang et al., 2015       |

a=Atmospheric condensate, b=Dew, ND=Not done

\*MSL=Mean Sea Level; N=Number of samples; Cond.= Conductivity in  $\mu\text{S}/\text{cm}$ ; Nitrate (NO<sub>3</sub><sup>-</sup>) and Sulphate (SO<sub>4</sub><sup>-2</sup>) are expressed in ( $\mu\text{eq}/\text{L}$ )

**Table S2.** Fog water characterization (N=20) along with particulate matter and meteorological data from 6 November 2017 to 2 February 2018 in Amritsar city

| S.N. | Date           | pH  | EC   | Chloride |       | Nitrate |       | Sulphate |       | NO <sub>2</sub> /SO <sub>4</sub> | Air Temp. | PM <sub>10</sub> | PM <sub>2.5</sub> | PM <sub>2.5</sub> /PM <sub>10</sub> | RH | Visibility |
|------|----------------|-----|------|----------|-------|---------|-------|----------|-------|----------------------------------|-----------|------------------|-------------------|-------------------------------------|----|------------|
|      |                |     |      | ppm      | µeq/L | ppm     | µeq/L | ppm      | µeq/L |                                  |           |                  |                   |                                     |    |            |
| 1    | 11/06/2017     | 7.0 | 0.54 | 20       | 571   | 52      | 836   | 83       | 1731  | 0.48                             | 20.8      | 287              | 129               | 0.45                                | 92 | 0.5        |
| 2    | 12/13/2017     | 7.1 | 0.27 | 8        | 222   | 19      | 311   | 46       | 956   | 0.33                             | 11.9      | 142              | 66                | 0.46                                | 96 | 0.2        |
| 3    | 12/14/2017     | 7.2 | 0.48 | 15       | 417   | 37      | 595   | 96       | 1997  | 0.30                             | 11.5      | 126              | 59                | 0.47                                | 92 | 1.2        |
| 4    | 12/16/2017     | 6.8 | 0.35 | 11       | 297   | 19      | 308   | 78       | 1614  | 0.19                             | 12.3      | 130              | 60                | 0.46                                | 76 | 3.4        |
| 5    | 12/17/2017     | 7.1 | 0.28 | 5        | 139   | 10      | 156   | 55       | 1148  | 0.14                             | 13.5      | 178              | 60                | 0.34                                | 74 | 3.2        |
| 6    | 12/25/2017     | 7.3 | 0.58 | 15       | 423   | -       | -     | 141      | 2943  | -                                | 14.7      | 216              | 117               | 0.54                                | 81 | 1.3        |
| 7    | 12/28/2017     | 6.5 | 0.38 | 12       | 351   | 13      | 208   | 101      | 2108  | 0.10                             | 14.4      | 186              | 99                | 0.53                                | 91 | 0.7        |
| 8    | 12/29/2018     | 7.2 | 0.24 | 72       | 2026  | 7       | 106   | 40       | 823   | 0.13                             | 14.6      | 203              | 103               | 0.51                                | 82 | 2.3        |
| 9    | 01/02/2018     | 7.0 | 0.42 | 8        | 216   | 14      | 232   | 114      | 2372  | 0.10                             | 10.8      | 243              | 137               | 0.56                                | 93 | 0.4        |
| 10   | 01/03/2018     | 7.2 | 0.33 | 13       | 373   | 25      | 403   | 118      | 2464  | 0.16                             | 9.1       | 183              | 89                | 0.49                                | 97 | 0.3        |
| 11*  | 01/05/2018     | 6.3 | 0.79 | 17       | 472   | 37      | 591   | 271      | 5642  | 0.10                             | -         | -                | -                 | -                                   | 84 | 1.8        |
| 12*  | 01/06/2018     | 7.2 | 0.40 | 5        | 155   | 11      | 174   | 73       | 1522  | 0.11                             | -         | -                | -                 | -                                   | 77 | 2.4        |
| 13*  | 01/09/2018     | 7.0 | 0.63 | 12       | 336   | 26      | 422   | 198      | 4132  | 0.10                             | -         | -                | -                 | -                                   | 76 | 2.2        |
| 14   | 01/15/2018     | 7.7 | 0.55 | 11       | 307   | 9       | 138   | 107      | 2231  | 0.06                             | 12.8      | 143              | 69                | 0.48                                | 71 | 2.4        |
| 15   | 01/16/2018     | 7.9 | 0.48 | 12       | 333   | 11      | 178   | 78       | 1615  | 0.11                             | 15.2      | 154              | 75                | 0.49                                | 75 | 1.9        |
| 16   | 01/19/2018     | 7.3 | 0.58 | 10       | 280   | 21      | 343   | 202      | 4212  | 0.08                             | 15.7      | 125              | 58                | 0.46                                | 72 | 2.2        |
| 17   | 01/26/2018     | 7.5 | 0.39 | 9        | 262   | 19      | 305   | 102      | 2122  | 0.14                             | 11.5      | 122              | 57                | 0.47                                | 89 | 0.8        |
| 18   | 01/28/2018     | 7.1 | 0.54 | 11       | 315   | 45      | 731   | 196      | 4077  | 0.18                             | 9.6       | 111              | 52                | 0.47                                | 97 | 0.6        |
| 19   | 01/29/2018     | -   | 0.40 | 4        | 108   | 14      | 221   | 153      | 3182  | 0.07                             | 11.5      | 105              | 47                | 0.45                                | 85 | 1.9        |
| 20   | 02/02/2018     | 7.6 | 0.48 | 8        | 221   | 13      | 215   | 116      | 2410  | 0.09                             | 16.5      | 100              | 34                | 0.34                                | 73 | 4.3        |
|      | <i>Min</i>     | 6.3 | 0.24 | 4        | 108   | 7       | 106   | 40       | 823   | 0.06                             | 9.1       | 100              | 34                | 0.34                                | 71 | 0.2        |
|      | <i>Max</i>     | 7.9 | 0.79 | 72       | 2026  | 52      | 836   | 271      | 5642  | 0.48                             | 20.8      | 287              | 137               | 0.56                                | 97 | 4.3        |
|      | <i>Average</i> | 7.2 | 0.46 | 14       | 391   | 20      | 324   | 118      | 2465  | 0.15                             | 13.3      | 162              | 77                | 0.47                                | 84 | 1.7        |

\* Data not taken in multiple regression analysis
